# Supplementary material
Source: publisher figshare collection journal article supplement (https://gsajournals.figshare.com/articles/dataset/_/7315478)
Supplement: Supplementary file 1 [file 1]

|                |                                                                       |
|----------------|-----------------------------------------------------------------------|
| WT <i>Sid1</i> | GATGACCTGGATGTGGTCCGGAGAGACCAGATCCCTGTCTTCTGAGCACCAGCATCACAGGGGAAGAC  |
| ssDNA          | GATGAttTGGAcGTcGTtaGacGcGAtCAGATCCCTGTCTTCTGAGCACCAGCATCACAGGGGcAAGAC |
| mice 1-32      | GATGACCTGGATGTGGTCCGGAGAGACCAGATCCCTGTCTTCTGAGCACCAGCATCACAGGGGAAGAC  |
|                | 96 nt Myc (3X)                                                        |
|                | 96 nt Myc (3X)                                                        |

  

|                                            |                                                                                                               |
|--------------------------------------------|---------------------------------------------------------------------------------------------------------------|
| WT <i>Sid2</i>                             | CCTCCACCCACCCCTTAGGTTTTGCTGACGTTGGATGACGACTTGGACACAGTACAGCGGGACAAGATCTATGTCTTCTAGCA                           |
| ssDNA                                      | CCTCCA <sup>g</sup> CCACCCCTTAGGTTTTGCTGACGTTGGATGACGA <sup>t</sup> cTcGAtACcGTtCAGCGcGACAAGATCTATGTCTTCTAGCA |
| mice 1,2,4,<br>10,13,17,22,<br>24,25,29,31 | CCTCCA <sup>g</sup> CCACCCCTTAGGTTTTGCTGACGTTGGATGACGA <sup>t</sup> cTcGAtACcGTtCAGCGcGACAAGATCTATGTCTTCTAGCA |
| mouse 26                                   | CCTCCACCCACCCCTTAGGTTTTGCTGACGTTGGATGACGA <sup>t</sup> cTcGAtACcGTtCAGCGcGACAAGATCTATGTCTTCTAGCA              |
|                                            | 87nt HA (3X)                                                                                                  |
|                                            | 87nt HA (3X)                                                                                                  |
|                                            | 87nt HA (3X)                                                                                                  |

**Figure S4. Sequence analysis of recovered *Sid1* alleles.**

A) *Sid1* sequence of mouse om11 (Figure S3) produced with the commercial oligo shows that the sgRNA1 associated PAM mutation introduced by the ssDNA oligo was not incorporated into the knock-in locus, while the sgRNA2 associated PAM mutation was incorporated. B) *Sid1* sequence analysis of truncation allele from outcrossed F<sub>2</sub> progeny (T142, T165, and T166) derived from F<sub>0</sub> mouse 2 (Figure 3) shows that the truncation is associated with an 8-10bp inverted insertion (yellow highlighted region) and a 39 bp deletion. The expected location of the single-strand nicks is shown (V).
