# Supplementary material
Source: publisher figshare collection journal article supplement (https://gsajournals.figshare.com/articles/dataset/_/7315478)
Supplement: Supplementary file 3 [file 1]

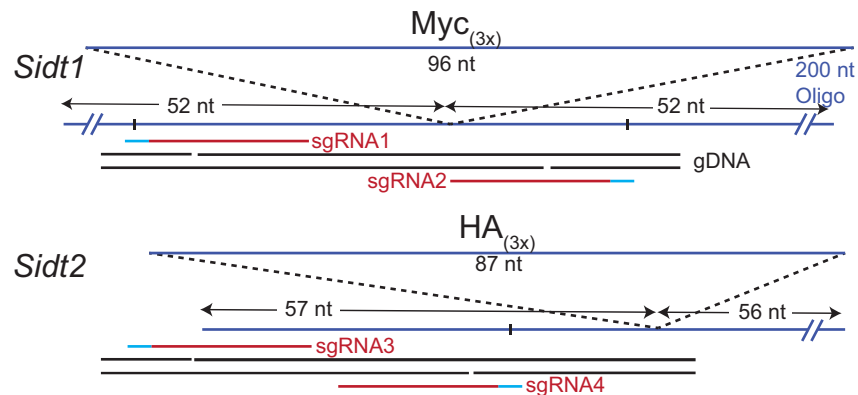

**Figure S1. Oligo ssDNA donor and sgRNAs.**

sgRNA1/2 (red) flank the *Sidt1* insertion site (IS), while sgRNA3/4 are both 5' of the IS. The resulting nickase produced single-stranded nicks on opposing genomic DNA (black) are indicated. The *Sidt1*-*Myc*<sub>(3x)</sub> ssDNA donor (blue) includes 52 nt and 49 nt flanking homology arms (measured from IS), and PAM (light blue) sites with 3<sup>rd</sup> position PAM mutations (vertical lines) in sgRNA1/2. The *Sidt2*-*HA*<sub>(3x)</sub> ssDNA donor includes 57 nt and 56 nt flanking homology arms, a single 2<sup>nd</sup> position PAM mutation in sgRNA4. sgRNA3 is only partially included in donor DNA. The perfect-matching 5'/3' homology arms are 15-/29-nt for *Sidt1* and 39-/56-nt for *Sidt2*.
