# Supplementary material
Source: publisher figshare collection journal article supplement (https://gsajournals.figshare.com/articles/dataset/_/7315478)
Supplement: Supplementary file 4 [file 1]

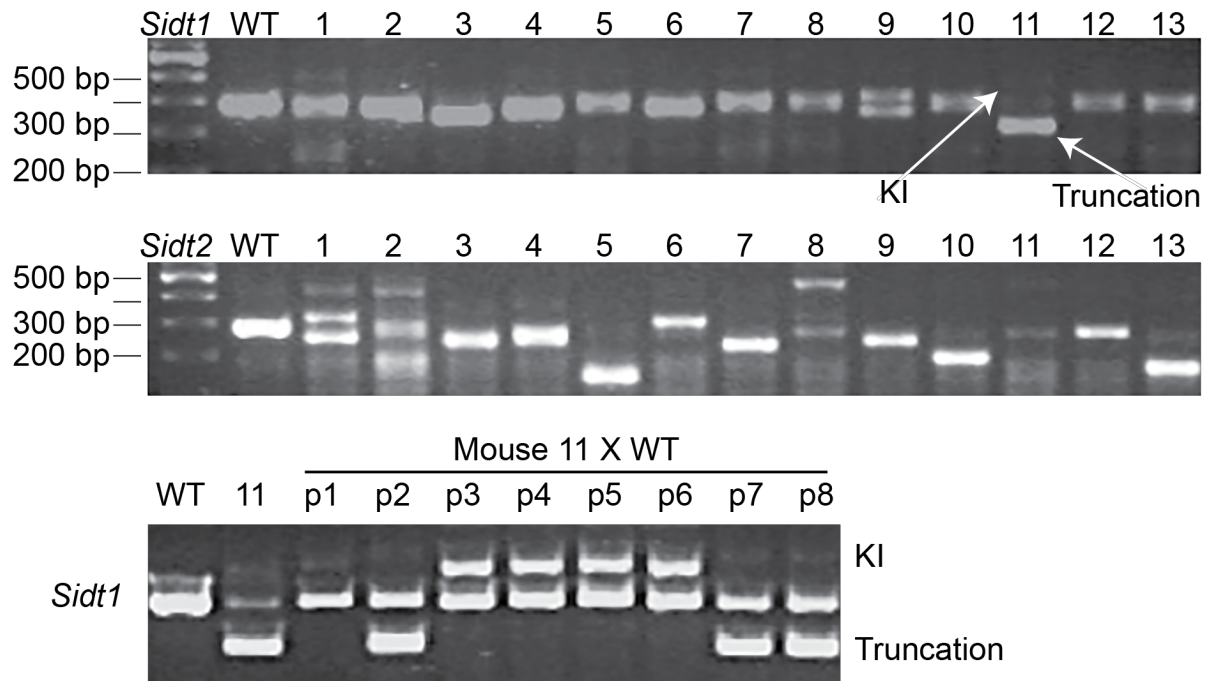

**Figure S3 Genotype analysis of F<sub>0</sub> mice produced with commercial oligo.**

PCR analysis (tail biopsies) shows that mouse om11 contained an insert of the expected size at the *Sidt1* locus as well as a truncation. Several additional mice appear to contain smaller *Sidt1* PCR products smaller and multiple bands indicating the presence of indels. The insert and the truncation associated with mouse om11 segregate from each other (lower panel) in the F<sub>1</sub>, suggesting a heterozygous state in F<sub>0</sub> parent. Apparent insertions at the *Sidt2* locus (middle panel) were determined to be multiple repeat insertions (data not shown).
