# Supplementary material
Source: publisher figshare collection journal article supplement (https://gsajournals.figshare.com/articles/dataset/_/7315478)
Supplement: Supplementary file 5 [file 1]

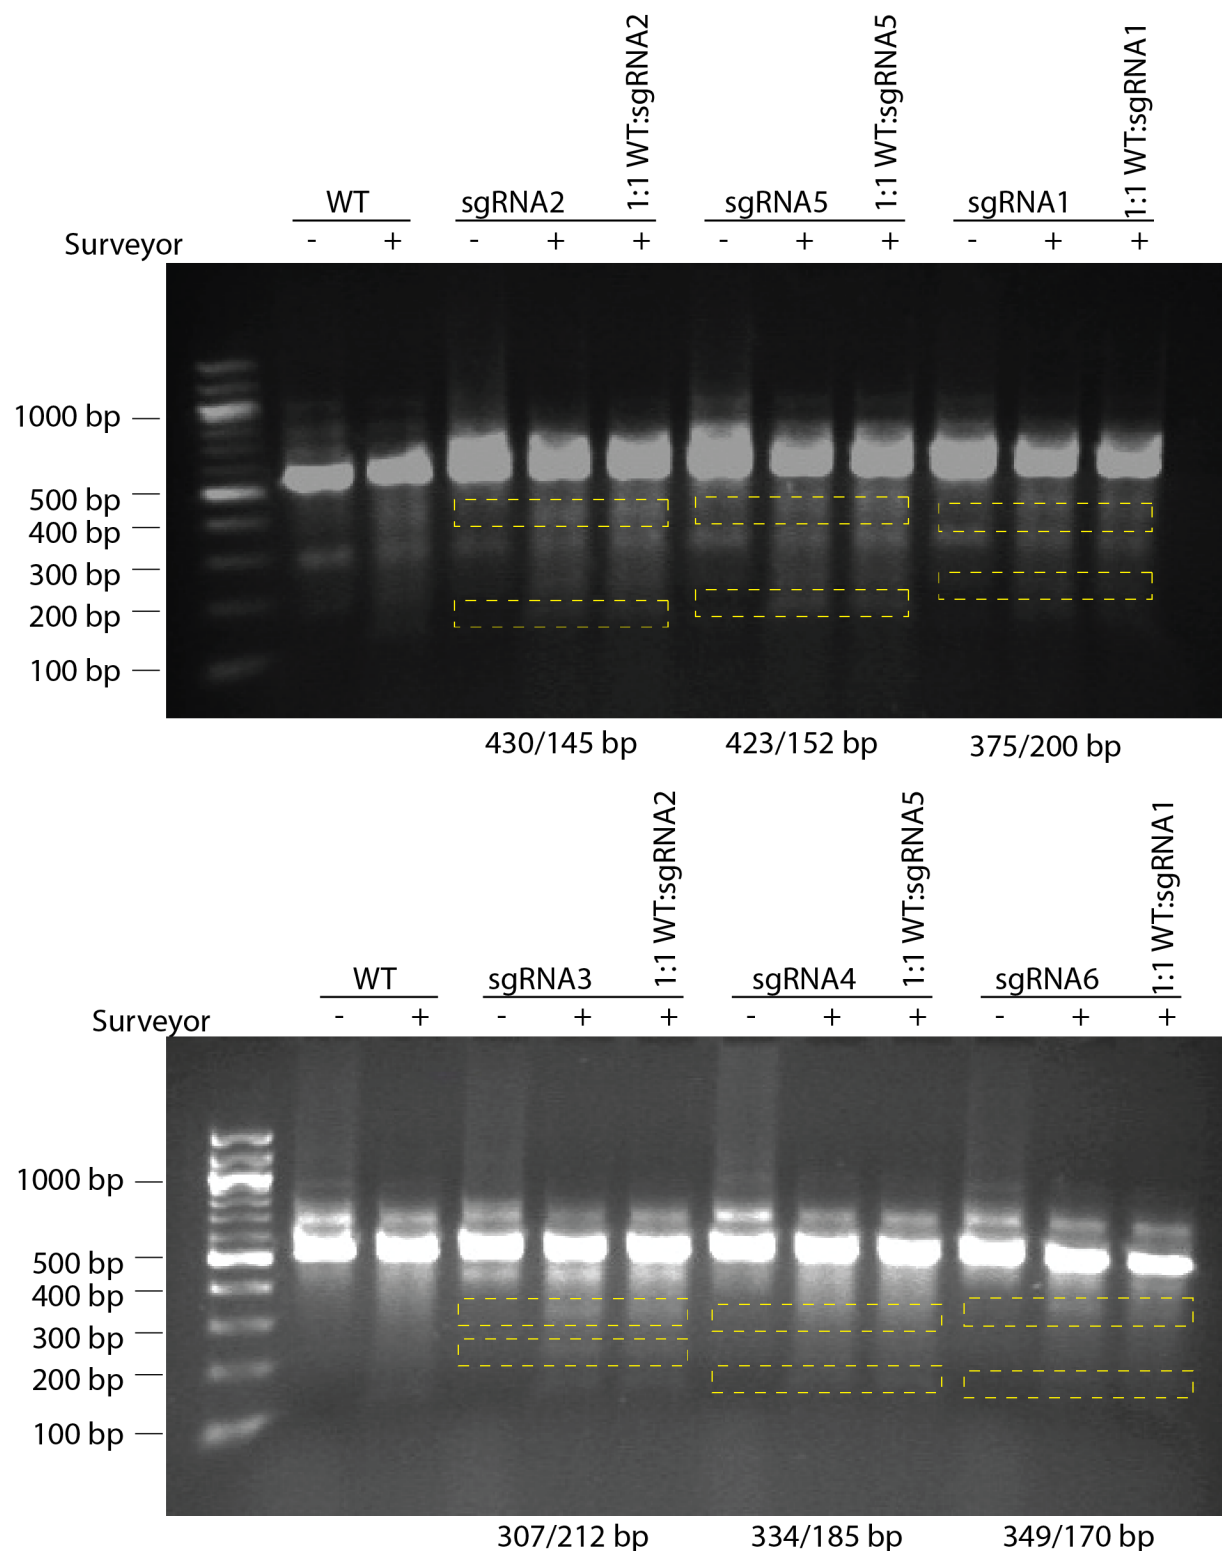

**Figure S2 Verification of the ability of the candidate sgRNAs in guiding the targeted cleavage by wild-type Cas9 in NIH3T3 cells.** Denaturation, re-annealing and Surveyor digestion of PCR amplified DNA from *Sidt1* (top) and *Sidt2* (bottom) Cas9/gRNA transfected cells. Expected surveyor dependent fragment sizes are displayed below each set of lanes and are highlighted on the image (yellow dashed boxes).
