# Supplementary material
Source: publisher figshare collection journal article supplement (https://gsajournals.figshare.com/articles/dataset/_/7315478)

Figure 1

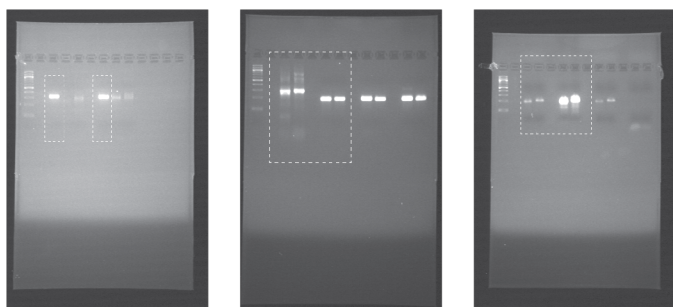

Figure 2

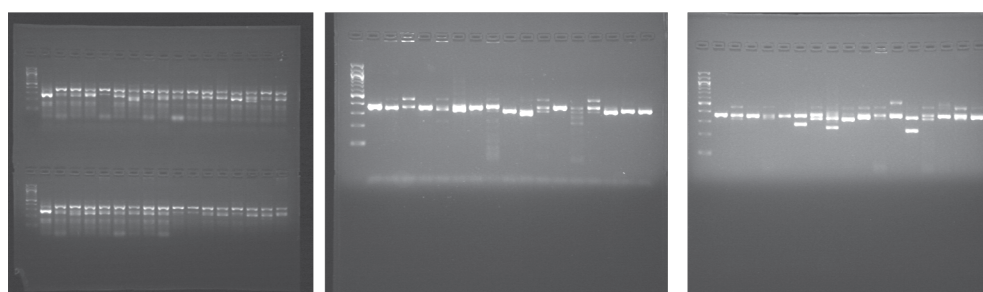

Figure 3

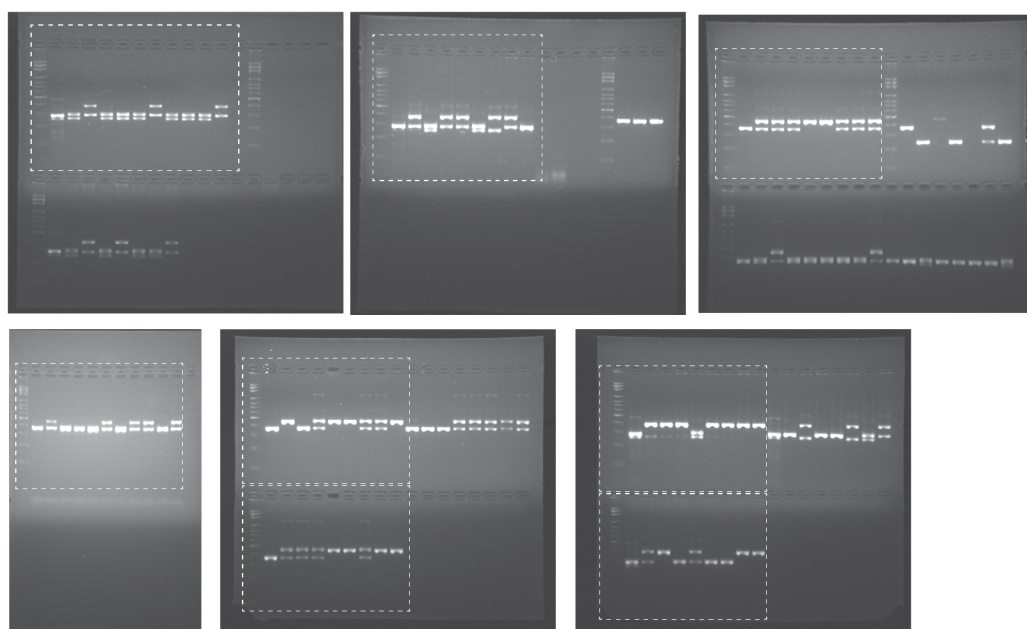

Figure S5 Original images for Figures 1, 2, and 3.

Supplement: Supplementary file 2 [file 1]
